# Supplementary material
Source: PubMed Central journal article supplement (PMC4347356)
Supplement: SD12.pdf [file SD12.pdf]

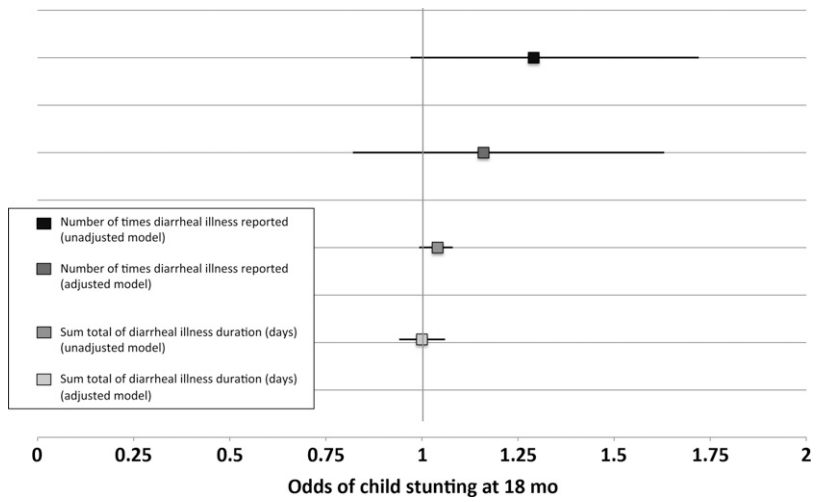

SUPPLEMENTAL FIGURE 1. Associations between diarrhea and odds of child stunting at 18 months of age. Associations between odds of stunting at 18 months of age and the cumulative number of times recent diarrheal illness was reported throughout the follow-up period and the sum total of the reported duration of diarrheal illness at each follow-up visit, in adjusted and unadjusted models. Adjusted models controlled for child sex, maternal height, household income, and birth length.
